# Supplementary material
Source: publisher site journal article supplement (https://www.spandidos-publications.com/2554/downloadSupplementary)

Figure S1. Cytotoxicity of catechol in dermal fibroblasts as assessed using the MTT assay following 48 h of exposure.

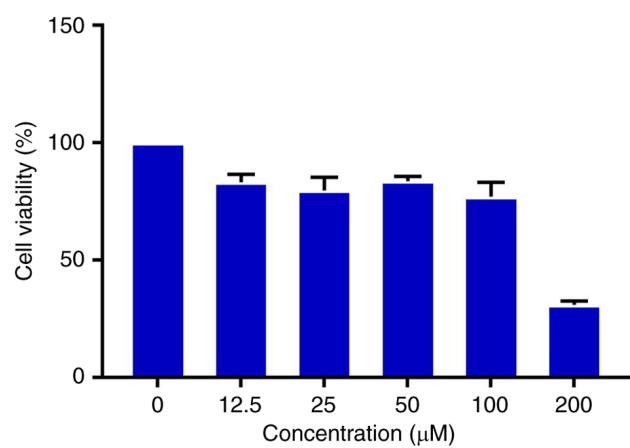

Supplement: Supplementary file 1 [file downloadSupplementary]
